# Supplementary material for: Multidentate polymers stabilized water-dispersed copper nanoclusters: facile photoreduction synthesis and selective fluorescence turn-on response
Source: Royal Society of Chemistry journal article supplement (doi:10.1039/c4ra03606a), 2014-06-17
Supplement: c4ra03606a1.pdf [file c4ra03606a1.pdf]

## Supporting Information

---

1 Multidentate polymers stabilized water-dispersed copper nanoclusters: Facile  
2 photoreduction synthesis and selective fluorescence Turn-On response

3

4 Rijun Gui,<sup>a,c,1</sup> Jie Sun,<sup>a,1</sup> Xiaoli Cao,<sup>b</sup> Yanfeng Wang<sup>a,\*</sup> and Hui Jin<sup>c</sup>

5

6 <sup>a</sup> *Institute of Materia Medica, Shandong Academy of Medical Sciences, Jinan 250062, P.R. China. E-mail:*

7 *wyfyikeyuan@126.com (Y. Wang); Fax: +86 531 82919963. Tel.: +86 531 67816486.*

8 <sup>b</sup> *Jinan Municipal Center for Disease Control & Precention, Jinan 250021, P.R. China.*

9 <sup>c</sup> *Department of Chemistry, School of Chemistry and Chemical Engineering, Shanghai Jiao Tong University,*

10 *Shanghai 200240, P.R. China.*

11 <sup>1</sup> *These authors have the equivalent contribution to this work.*

12

### 13 **Part S1. Synthesis of PAA-g-MEA**

14 Based on the previously reported methods,<sup>[1,2]</sup> multidentate polymers (poly(acrylic acid)-*graft*-mercaptoethylamine,  
15 PAA-g-MEA) were prepared. In a typical experiment, 15% of –COOH groups are nominally modified with MEA  
16 portion. For a nominal 15% grafting percentage of PAA, briefly, 0.9 g of dried PAA powder (12.5 mmol based on –  
17 COOH groups) was dissolved in 30 mL of MPD at 60 °C for 24 h. Then, the mixed solutions of 0.22 g dried MEA  
18 (1.88 mmol) dissolved in 3 mL MPD and 0.44 g DCC (2.1 mmol) dissolved in 2 mL MPD were added into the  
19 PAA solution under vigorous stirring. After a reaction for 72 h at 60 °C to produce a bifunctional grafted PAA  
20 polymer with 15% of the –COOH functional groups modified with MEA portion. The reaction system was cooled  
21 to room temperature, centrifuged and the precipitates were discarded, followed by the addition of 20 mL of 40 wt%  
22 NaOH solution to precipitate the polymers. The precipitates were washed repeatedly with 10 mL of hot MPD at 60

## Supporting Information

1 °C, and then with 12 mL of methanol at room temperature. After filtration, the products were dissolved in 10 mL of  
2 water at 30 °C, and precipitated in 100 mL of methanol twice. The treated products were exposed to the air for 30  
3 min, and then dissolved into 10 mL of water. The final dry products were obtained by freeze-drying. Each polymer  
4 molecule contained ~3.6 thiol groups, as determined by typical <sup>1</sup>H-NMR spectrum of PAA-g-MEA (in **Fig. S1**).

5 The nominal 15% of grafting percentage PAA-g-MEA polymers were characterized by <sup>1</sup>H-NMR. The actual -SH  
6 groups per single PAA chain determined by <sup>1</sup>H-NMR spectrum to be ~3.6 of -SH groups based on the peak area  
7 ratio between -CH<sub>2</sub> groups from PAA backbone (at 1.35 ppm) and -CH<sub>2</sub> groups connected to -SH groups from the  
8 MEA portion (at 2.32 ppm).

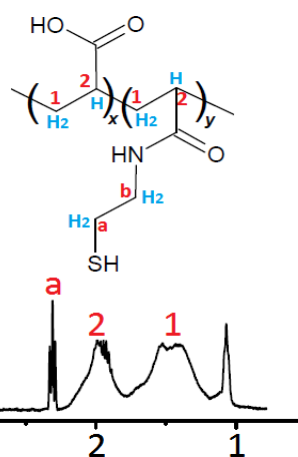

10  
11 **Fig. S1** <sup>1</sup>H-NMR spectra of the as-prepared PAA-g-MEA polymers.

## 12 References

- 13 [1] L. Liu, X. Guo, Y. Li and X. Zhong, *Inorg. Chem.*, 2010, **49**, 3768-3775.  
14 [2] X. Guo, A. A. Abdala, B. L. May, S. F. Lincoln, S. A. Khan and R. K. Prudhomme, *Macromolecules*, 2005,  
15 **38**, 3037-3040.

16
